# Supplementary material for: Incidence, severity, and preventability of adverse events during the induction of patients with acute lymphoblastic leukemia in a tertiary care pediatric hospital in Mexico
Source: PubMed Central journal article supplement (PMC8947076; doi:10.1371/journal.pone.0265450), 2022-03-24
Supplement: pone.0265450.s009.pdf [file pone.0265450.s009.pdf]

1  
2  
3  
4  
5  
6  
7  
8  
9  
10  
11  
12  
13  
14  
15  
16  
17  
18  
19  
20  
21  
22  
23

Hospital Infantil de México Federico Gómez

Departamento de Evaluación de Medicamentos y Farmacovigilancia

Protocolo de investigación

**Incidencia, severidad y prevenibilidad de eventos adversos en el tratamiento de inducción a la remisión de pacientes con leucemia linfoblástica aguda en un hospital pediátrico de tercer nivel en México.**

*Fecha: 27 de agosto de 2021*

*Versión corregida.*

|    |                                                                                    |    |
|----|------------------------------------------------------------------------------------|----|
| 24 | <b>Índice</b>                                                                      |    |
| 25 |                                                                                    |    |
| 26 | INTRODUCCIÓN .....                                                                 | 4  |
| 27 | MARCO TEÓRICO .....                                                                | 5  |
| 28 | <b>Calidad de la atención y Seguridad del paciente.</b> .....                      | 5  |
| 29 | <b>Eventos adversos en atención a la salud.</b> .....                              | 5  |
| 30 | <b>Medición de los eventos adversos.</b> .....                                     | 5  |
| 31 | <b>Causalidad y tipos de eventos adversos.</b> .....                               | 6  |
| 32 | <b>Eventos adversos asociados a procedimientos y cirugías.</b> .....               | 6  |
| 33 | <b>Eventos adversos asociados a medicamentos.</b> .....                            | 7  |
| 34 | <b>Infecciones asociadas a la atención hospitalaria.</b> .....                     | 7  |
| 35 | <b>Severidad.</b> .....                                                            | 8  |
| 36 | <b>Prevenibilidad.</b> .....                                                       | 8  |
| 37 | ANTECEDENTES .....                                                                 | 9  |
| 38 | <b>Leucemia linfoblástica aguda en México.</b> .....                               | 9  |
| 39 | <b>Atención de la leucemia linfoblástica aguda y seguridad del paciente.</b> ..... | 9  |
| 40 | <b>Eventos adversos en oncología y la prevenibilidad.</b> .....                    | 10 |
| 41 | PLANTEAMIENTO DEL PROBLEMA .....                                                   | 15 |
| 42 | PREGUNTA DE INVESTIGACIÓN .....                                                    | 16 |
| 43 | JUSTIFICACIÓN .....                                                                | 16 |
| 44 | OBJETIVOS .....                                                                    | 16 |
| 45 | MÉTODOS .....                                                                      | 17 |
| 46 | <b>Diseño de estudio.</b> .....                                                    | 17 |
| 47 | <b>Población de estudio.</b> .....                                                 | 17 |
| 48 | <b>Marco muestral.</b> .....                                                       | 17 |

|    |                                                       |    |
|----|-------------------------------------------------------|----|
| 49 | <b>Unidad de muestreo.....</b>                        | 17 |
| 50 | <b>Criterios de selección.....</b>                    | 18 |
| 51 | <b>Diseño de la muestra. ....</b>                     | 19 |
| 52 | <b>VARIABLES DE ESTUDIO .....</b>                     | 19 |
| 53 | <b>Procedimiento.....</b>                             | 24 |
| 54 | <b>Diseño estadístico.....</b>                        | 27 |
| 55 | <b>Consideraciones éticas y de bioseguridad .....</b> | 28 |
| 56 | <b>REFERENCIAS .....</b>                              | 29 |
| 57 |                                                       |    |
| 58 |                                                       |    |

## INTRODUCCIÓN

59  
60  
61  
62  
63  
64  
65  
66  
67  
68  
69  
70  
71  
72  
73  
74  
75  
76  
77  
78  
79  
80

Los eventos adversos constituyen un daño al paciente asociado con el manejo médico, en lugar de complicaciones por una enfermedad subyacente. Algunos eventos adversos aparecen por fallas en los procesos de atención que podrían ser prevenibles. De tal modo que el estudio de la frecuencia e impacto de los eventos adversos prevenibles se considera necesario para mejorar la seguridad del paciente y la calidad de la atención.

Durante el manejo médico de los pacientes con leucemia linfoblástica aguda, la presencia de eventos adversos relacionados a la terapia que reciben se traduce en una pesada carga de síntomas para ellos, particularmente en poblaciones pediátricas donde la frecuencia y severidad del daño puede subestimarse.

En México como otros países de ingresos medios y bajos, los protocolos de tratamiento de leucemia linfoblástica aguda se adaptan de protocolos exitosos en países con alto nivel de desarrollo y menores limitaciones de recursos en sus sistemas de salud. Por consiguiente es necesario investigar la seguridad de tales adaptaciones para identificar oportunidades de reducción y prevención de daño al paciente.

Sin embargo, en nuestro país no se realizó una descripción de los eventos adversos con un enfoque en la prevenibilidad del daño asociado al cuidado de la salud. Por ello, el objetivo de este protocolo es estudiar la frecuencia, tipo, severidad y prevenibilidad de los eventos adversos ocurridos en pacientes pediátricos con leucemia linfoblástica aguda, durante la fase de inducción a la remisión de pacientes atendidos en un Instituto Nacional de Salud pediátrico.

## MARCO TEÓRICO

81

82

### 83 **Calidad de la atención y Seguridad del paciente.**

84 La Organización Mundial de la Salud (OMS) define calidad de la atención como el grado en que  
85 la atención para los sujetos y poblaciones incrementan la probabilidad de obtener un resultado de  
86 salud deseado<sup>1</sup>. Una de las dimensiones que constituyen una atención de calidad es la seguridad  
87 del paciente<sup>1,2</sup>. Esta es un tema central ya que una atención insegura puede resultar en daño a los  
88 pacientes y costos económicos para los sistemas de salud<sup>3</sup>. La OMS define seguridad del paciente  
89 como la ausencia de daño prevenible durante el proceso de atención y la reducción de riesgos de  
90 daño innecesario, relacionados con la atención sanitaria hasta un mínimo aceptable con base en el  
91 conocimiento actual, los recursos disponibles, y el contexto de la atención<sup>4</sup>.

### 92 **Eventos adversos en atención a la salud.**

93 Se estima que uno de cada cuatro pacientes en los países de ingresos medios y bajos sufre algún  
94 evento adverso (EA) en hospitalización como resultado de la atención recibida<sup>5</sup>. Además se  
95 estima que 15% del consumo hospitalario en países de ingresos altos se utiliza en atender EA por  
96 una atención insegura<sup>6</sup>. Existen diversas definiciones de EA, todas involucran la presencia de un  
97 daño o signo desfavorable en el paciente como consecuencia del manejo médico y no por una  
98 enfermedad subyacente o su progreso<sup>7-9</sup>. También se suele enfatizar la relación temporal del EA  
99 con algún tratamiento médico o procedimiento<sup>10,11</sup>, así como el carácter involuntario del daño<sup>7,12</sup>.

100 Es bien sabido que la aplicación de la medicina clínica implica una relación intrínseca entre  
101 beneficio a la salud y riesgo de daño al paciente, tal como en los procedimientos quirúrgicos o la  
102 utilización de medicamentos; pero también las fallas en los procesos, sistemas o equipos que  
103 intervienen en cualquier etapa del cuidado de la salud pueden resultar en daños para los  
104 pacientes<sup>9</sup>. En el primer caso se denominan EA no prevenibles, en el segundo caso se denominan  
105 EA prevenibles<sup>13</sup>.

### 106 **Medición de los eventos adversos.**

107 Los EA se consideran indicadores útiles en la evaluación de la seguridad del paciente, por lo cual  
108 existen distintos métodos para su medición, como son: los sistemas de reporte voluntario  
109 anónimo, la identificación prospectiva, y la revisión retrospectiva de registros clínicos. Este

110 último método se considera el método estándar de búsqueda y evaluación epidemiológica de  
111 EA<sup>14</sup>, debido a su mayor eficiencia en comparación con los métodos de reporte voluntario y el  
112 menor consumo de recursos y tiempo de estudio que los métodos de medición prospectivos. Sin  
113 embargo, la principal desventaja de las revisiones retrospectivas es la calidad y completitud de  
114 los registros clínicos, la necesidad de exhaustividad y experiencia de los revisores, así como la  
115 necesidad de revisar grandes volúmenes de registros<sup>15</sup>.

116 Debido que ningún método único puede identificar todos los EA ocurridos en la atención de los  
117 pacientes<sup>16,17</sup>, se suelen combinar distintos métodos, así como herramientas complementarias  
118 para hacer más eficiente la búsqueda prospectiva o retrospectiva de EA<sup>18</sup>.

119 En los métodos retrospectivos participan al menos dos revisores experimentados en la atención a  
120 pacientes, altamente calificados en la aplicación de los mejores estándares de la medicina clínica.  
121 Ambos deben realizar una revisión independiente y cegada de cada registro clínico, tanto para la  
122 determinación de cada EA, causalidad, así como severidad y prevenibilidad. Las evaluaciones sin  
123 acuerdo entre los revisores suelen ser resueltas por la revisión de un tercer revisor experto, o la  
124 discusión de los casos entre los revisores para alcanzar un consenso; pero cuando este no se  
125 alcanza, la decisión la toma un tercer juez<sup>19,20</sup>.

### 126 **Causalidad y tipos de eventos adversos.**

127 La evaluación de la causalidad y severidad son necesarias para cualquier EA porque ayudan a  
128 determinar su importancia en el ámbito clínico<sup>21</sup>. Adicionalmente, otros atributos como servicio  
129 de aparición, especialidad de atención, y especialmente la prevenibilidad suelen ser de  
130 importancia para describir el desempeño de los sistemas de atención<sup>15,22,23</sup>.

131 La clasificación por etiología distingue comúnmente tres grandes tipos: (i) EA post operatorios o  
132 complicaciones relacionadas a procedimientos médicos o reingresos a cirugía, (ii) EA asociados a  
133 medicamentos (EAM), (iii) y EA por infecciones asociadas a la atención hospitalaria (infecciones  
134 nosocomiales)<sup>22</sup>. Otros EA con frecuencia variable de acuerdo al ámbito de atención y población  
135 atendida son los EA asociados a diagnóstico, caídas o fracturas, anestesia, posparto u obstétrico,  
136 entre otros<sup>15,22</sup>.

### 137 **Eventos adversos asociados a procedimientos y cirugías.**

138 La ejecución poco segura de procedimientos quirúrgicos provoca EA por complicaciones hasta  
139 en 25% de los pacientes<sup>24</sup>. Se consideran EA de este tipo aquellos daños ocasionados por fallas  
140 en la ejecución técnica o planeación de un procedimiento invasivo bajo anestesia general,  
141 regional o sedación profunda, como existencia de cuerpo extraño, sangrado postoperatorio,  
142 quemadura, lesión en órganos, lesión vascular u otra de naturaleza no infecciosa<sup>25-27</sup>. En  
143 poblaciones pediátricas mexicanas de 0 a 16 años, 1 de cada 10 pacientes puede presentar un EA  
144 relacionado a procedimientos quirúrgicos, entre las cuales 29% son complicaciones por lesión en  
145 órgano, falla en la aplicación técnica de un procedimiento, retraso en el tratamiento, y cuerpos  
146 extraños<sup>25</sup>. Los EA prevenibles más frecuentes están relacionados con la técnica y sangrado  
147 postoperatorio, que en conjunto pueden ser prevenibles en 74%<sup>26,28</sup>.

#### 148 **Eventos adversos asociados a medicamentos.**

149 Un EAM es el daño causado por un medicamento, ya sea su uso apropiado o inapropiado<sup>9,11,20,29</sup>.  
150 La definición tradicional de EAM incluye: respuestas nociva al fármaco, no intencionadas, que se  
151 presentan con dosis normalmente usadas para la profilaxis, diagnóstico, tratamiento de una  
152 enfermedad o modificación de una función fisiológica en el ser humano que normalmente se  
153 denominan reacciones adversas a medicamentos (RAMs); también interacciones farmacológicas  
154 manifestadas clínicamente, toxicidad aguda o falta de eficacia terapéutica por uso inapropiado o  
155 errores de medicación (EM) (dosificación, prescripción inapropiada, notas ilegibles, etc), y abuso  
156 de los medicamentos<sup>20,30</sup>.

#### 157 **Infecciones asociadas a la atención hospitalaria**

158 Las infecciones contraídas por un paciente durante su tratamiento en un hospital u otra institución  
159 de atención, y que el paciente no estaba incubando al momento de su ingreso se denominan  
160 infecciones asociadas al cuidado hospitalario<sup>31</sup>. Su concepto se extiende a infecciones asociadas a  
161 la atención sanitaria en sentido amplio<sup>32</sup>. También son uno de los EA más frecuentes durante la  
162 hospitalización de un paciente con impacto en la mortalidad<sup>33</sup> y se consideran fallas del sistema  
163 que se asocian con mayor número de complicaciones, duración y costo de la estancia  
164 hospitalaria<sup>13,34</sup>, y han sido más estudiadas en adultos que en niños<sup>34</sup>. Varios factores de riesgo  
165 contribuyen en su aparición, como una técnica deficiente de colocación de sondas, catéteres u  
166 otros dispositivos médicos invasivos, pacientes con traumas, quemaduras e inmunodeprimidos,  
167 así como fallas en las prácticas básicas de higiene<sup>13</sup>.

168 **Severidad.**

169 El termino severidad describe la intensidad de un evento clínico sea cual sea su etiología<sup>19</sup>. Medir  
170 la severidad de un EA permite comunicar su relevancia clínica, mientras que estandarizar las  
171 escalas permite hacer más confiable la información sobre seguridad del paciente, proyectos de  
172 mejora de la calidad y ayuda a establecer la razón riesgo/beneficio de las terapias usadas  
173 habitualmente<sup>21</sup>. La intensidad se mide por escalas con criterios explícitos para cada categoría, y  
174 que pueden ser genéricas o específicas para un grupo de pacientes o especialidad<sup>35,36</sup>.

175 Para clasificar los EA en pacientes oncológicos se utiliza habitualmente la *Common Terminology*  
176 *Criteria for Adverse Events (CTCAE)*<sup>37-40</sup>, una taxonomía desarrollada por el *National Cancer*  
177 *Institute* de Estados Unidos, cuya quinta versión clasifica la severidad de cientos de EA mediante  
178 criterios clínicos y marcadores biomédicos específicos, los cuales se dividen en cinco grados de  
179 intensidad<sup>36</sup>:

180 Grado 1 (leve): observaciones clínicas o diagnósticas, signos de laboratorio asintomáticos o  
181 síntomas leves que no requieren intervención médica.

182 Grado 2 (moderado): manifestaciones que requieren intervenciones mínimas, locales o no  
183 invasivas.

184 Grado 3 (severo): requieren o prolongan la hospitalización o son incapacitantes.

185 Grado 4 (amenaza la vida): cuando se requiere una intervención médica urgente.

186 Grado 5 (muerte): cuando la muerte está relacionada al EA.

187 **Prevenibilidad.**

188 Aunque el concepto de prevenibilidad no tiene una definición en consenso<sup>41</sup>, se considera que un  
189 EA es prevenible cuando los métodos para evitar el daño se conocen<sup>42</sup>, es decir, cuando es  
190 resultado de una atención clínica inconsistente con un estándar de práctica aceptado, o una  
191 complicación relacionada a un tratamiento que pudo ser anticipada<sup>43</sup>. Por esto, se necesita  
192 distinguir el daño prevenible del que no lo es<sup>13,37</sup>, pues algunos pacientes experimentan daño aun  
193 recibiendo la mejor terapia<sup>44</sup> bajo el principio de justicia donde el beneficio supere al riesgo de  
194 acción o no acción<sup>45</sup>. Pero tampoco la presencia de fallas o errores en el manejo médico conduce  
195 necesariamente a la aparición de algún EA, y no todos los errores son completamente  
196 prevenibles<sup>46</sup>.



197 Por lo anterior, se han propuesto diversos instrumentos para determinar la prevenibilidad de los  
198 EA, cuya estructura, método y criterios de evaluación difieren entre sí<sup>41</sup>. Ciertos tipos de  
199 instrumentos requieren la aplicación subjetiva del criterio del evaluador, buscando aplicar el  
200 concepto de adherencia a la mejor práctica médica<sup>7,47,48</sup>. Todos estos ofrecen una definición de  
201 prevenibilidad, algunos incluyen una escala tipo Likert o criterios específicos para determinar  
202 grados de prevenibilidad. Se consideran el mejor método para evaluar prevenibilidad, porque  
203 permiten evaluar múltiples factores y el contexto del EA. Sin embargo, requiere de un alto nivel  
204 de experiencia clínica y capacitación profesional<sup>20,41</sup>. Otros instrumentos están basados en  
205 algoritmos de decisión<sup>49</sup> y tienen un enfoque reduccionista de la prevenibilidad, así como una  
206 capacidad limitada para captar la complejidad de la atención, siendo sumamente influenciados  
207 por el sesgo retrospectivo<sup>41</sup>.

208

209

## ANTECEDENTES

210

### 211 **Leucemia linfoblástica aguda en México.**

212 En México la principal enfermedad neoplásica en grupos pediátricos es la leucemia linfoblástica  
213 aguda (LLA)<sup>50,51</sup>. Es el tipo más común de leucemias agudas en la niñez, y se caracteriza por una  
214 proliferación desregulada de las células precursoras de linfocitos en la médula ósea<sup>51,52</sup>. En  
215 América Latina la mortalidad temprana relacionada al tratamiento de la LLA en pediatría no se  
216 ha reducido por décadas<sup>53,54</sup> y particularmente en México, donde la mortalidad durante la primera  
217 fase de tratamiento, la inducción a la remisión, varía desde 5.4% hasta 15%<sup>55,56</sup>.

### 218 **Atención de la leucemia linfoblástica aguda y seguridad del paciente.**

219 Los protocolos modernos de quimioterapia para LLA tienen tres etapas fundamentales: la  
220 inducción a la remisión, consolidación y mantenimiento<sup>52,57,58</sup>. Entre estas la inducción a la  
221 remisión es una etapa crítica para la seguridad de los pacientes, porque las complicaciones de la  
222 actividad de la leucemia siguen manifestándose, mientras que se presentan por primera vez EA  
223 asociados al manejo médico de la enfermedad<sup>59,60</sup>. La recurrencia conocida de dichos EA y  
224 complicaciones se traduce en una pesada carga de síntomas para los pacientes<sup>61</sup>. Adicionalmente,  
225 se ha mostrado que se subestima la frecuencia y severidad de los EA, particularmente en

226 pacientes de oncología pediátrica debido a limitaciones en la comunicación de los niños, la mala  
227 interpretación de los familiares o la subestimación de signos o síntomas por parte de los  
228 oncólogos<sup>10,62</sup>.

229 Se debe considerar que en México como en otros países de ingresos bajos y medios, los  
230 protocolos de quimioterapia aplicados suelen adaptarse de protocolos exitosos desarrollados en  
231 países de ingresos altos<sup>53,63</sup>, donde los sistemas de salud disponen de mayores recursos para la  
232 atención y el contexto socioeconómico de sus poblaciones es sustancialmente distinto<sup>64</sup>. Sumado  
233 a la escasez de intervenciones eficaces para el tratamiento o mitigación para todos los EA que se  
234 asocian al manejo terapéutico de los pacientes en sus diferentes aspectos<sup>61</sup>. Debido a lo anterior,  
235 se considera fundamental hacer énfasis en la investigación de EA<sup>23,65-67</sup> e identificar  
236 oportunidades de prevención de daño al paciente, para optimizar el éxito de tales  
237 adaptaciones<sup>53,63</sup> y la seguridad de los procesos de atención<sup>68-70</sup>.

#### 238 **Eventos adversos en oncología y la prevenibilidad.**

239 Pocos estudios han investigado la prevenibilidad de diversos tipos de EA en pacientes  
240 oncológicos, ya sea adultos o pediátricos<sup>12,68,71-75</sup>. Otros estudio sólo se han enfocado en las  
241 características de EAM<sup>37,76-78</sup>. La mayor cantidad de estudios enfocados en la prevenibilidad de  
242 EA provienen de países de ingresos medios y bajos, en los cuales predominan métodos de  
243 evaluación explícitos basados en algoritmos que priorizan un enfoque reduccionista de los  
244 procesos de atención<sup>73-78</sup>.

245 A nivel internacional, los EA en grupos pediátricos pueden aparecer entre 1.3% y 3.0% de las  
246 hospitalizaciones<sup>79</sup>. Específicamente la tasa de incidencia de EA observada entre pacientes  
247 oncológicos hospitalizados varía en el rango de 2.3 a 106 EA cada 1000 días-paciente<sup>12,68,71-73,75</sup>.  
248 La amplia variación no sólo aparece entre estudio de países de ingresos altos, medio y bajos, sino  
249 también dentro de países de ingresos altos<sup>79</sup>.

250 Por su parte, la proporción de EA prevenibles también son ampliamente variables entre grupos  
251 diversos de pacientes oncológicos, variando entre 7 y 50.7%<sup>12,37,68,71-75</sup>. Las principales fuentes de  
252 variación son el tipo de fármacos quimioterapéuticos predominantes de un estudio a otro, así  
253 como el uso de escalas con criterios explícitos o algoritmos de decisión y con criterios implícitos

254 o subjetivos de expertos, estos últimos suelen tener mayor validez al tiempo que representan  
255 mayor tiempo y preparación que otros métodos.

| Cuadro 1. Publicaciones sobre eventos adversos en pacientes oncológicos que incluyen el análisis de la prevenibilidad. |                                  |                                                                                                   |                                                                                                                                   |                                         |                   |                            |                                                                                |                                                                            |                                                                                                                                                               |
|------------------------------------------------------------------------------------------------------------------------|----------------------------------|---------------------------------------------------------------------------------------------------|-----------------------------------------------------------------------------------------------------------------------------------|-----------------------------------------|-------------------|----------------------------|--------------------------------------------------------------------------------|----------------------------------------------------------------------------|---------------------------------------------------------------------------------------------------------------------------------------------------------------|
| Autor/<br>año                                                                                                          | Diseño                           | Muestra                                                                                           | Evaluación de EA                                                                                                                  |                                         |                   | Severidad                  |                                                                                | Prevenibilidad                                                             |                                                                                                                                                               |
|                                                                                                                        |                                  |                                                                                                   | Método<br>revisión                                                                                                                | Causalidad                              | Frecuencia        | Instrumento                | Proporción                                                                     | Instrumento                                                                | Frecuencia                                                                                                                                                    |
| Chopra,<br>2016 <sup>73</sup><br>India                                                                                 | Cohorte<br>prospectiva           | Pacientes con<br>carcinomas<br>tratados en un<br>hospital de<br>tercer nivel                      | Reporte<br>espontaneo<br>de EA                                                                                                    | Escala de<br>probabilidad<br>de Naranjo | IA= 58.6%         | Escala<br>Hartwig<br>Sigel | 0.2% severos<br>12.9% moderados<br>87% leves                                   | Criterios<br>Schumock-<br>Thornton<br>(Explícito)                          | 7% prevenibles<br>42% probablemente<br>prevenibles<br>51% no prevenibles                                                                                      |
| Shrestha,<br>2017 <sup>75</sup><br>Nepal                                                                               | Cohorte<br>prospectiva           | Pacientes con<br>cáncer que<br>recibieron<br>quimioterapia y<br>que presentaron<br>al menos un EA | Vigilancia<br>activa                                                                                                              | Escala de<br>probabilidad<br>de Naranjo | n.a.              | Escala<br>Hartwig<br>Sigel | 6.1% severos<br>73.4 moderados<br>20.5% leves                                  | Criterios<br>Schumock-<br>Thornton<br>(Explícito)                          | 42.7% prevenibles<br>52.2%<br>probablemente<br>prevenibles<br>5.1% no prevenibles                                                                             |
| Lau, 2004 <sup>74</sup><br>Australia                                                                                   | Cohorte<br>retro-<br>prospectiva | Pacientes >18<br>años atendidos<br>en un Centro<br>Especializado<br>que aceptaron<br>participar   | Vigilancia<br>activa y<br>revisión de<br>expedientes                                                                              | Escala de<br>probabilidad<br>de Naranjo | IA= 74.3%         | n.a.                       | n.a.                                                                           | Criterios<br>Schumock-<br>Thornton<br>(Explícito)                          | 53.4% no<br>prevenible<br>45% probablemente<br>prevenibles<br>2% prevenibles                                                                                  |
| Lipitz,<br>2017 <sup>12</sup><br>EEUU                                                                                  | Cohorte<br>retrospectiva         | Adultos >18a<br>con cáncer de<br>mama,<br>colorrectal o<br>pulmón del NCI                         | Revisión de<br>expedientes<br>en dos<br>etapas con<br>GTT                                                                         | Revisión de<br>expertos                 | TI=2.3/1000<br>dp | NCCMERP                    | 94% serios<br>6% daño<br>permanente                                            | Criterios de<br>Ghandi<br>(Implícito)                                      | 31.5 EA/1000dp<br>prevenibles<br>3.8 EA/1000dp<br>mitigables<br>55.9 EA/1000dp no<br>prevenibles                                                              |
| Call, 2014 <sup>37</sup><br>EEUU                                                                                       | Cohorte<br>retrospectiva         | Pacientes con<br>cancer atendidos<br>en el St. Jude<br>Children´s<br>Research<br>Hospital         | Reporte<br>espontaneo<br>de EAM y<br>revisión de<br>registros<br>electrónicos<br>en dos<br>etapas con<br>Canadian<br>Trigger Tool | Escala del<br>HMPS                      | n.a.              | NCCMERP<br>y<br>CTCAE v4   | 82% daño<br>temporal<br>3% daño<br>permanente<br>3% pone en<br>peligro la vida | Escala de<br>prevenibilidad<br>del Canadian<br>Trigger Tool<br>(Implícito) | 36.3% prevenible<br>15.2%<br>probablemente<br>prevenible<br>12.1% posiblemente<br>prevenible<br>27.2%<br>probablemente no<br>prevenible<br>9.1% no prevenible |
| Gerber,                                                                                                                | Cohorte                          | Pacientes >18                                                                                     | Revisión de                                                                                                                       | Revisión y                              | IA=42%            | NCCMERP                    | 67.4% requirió                                                                 | Definición de                                                              | 22% prevenibles                                                                                                                                               |

|                                          |                       |                                                                                                                          |                                                                                                                                       |                                   |                                                        |                      |                                                                                                                                    |                                                                                                                        |                                                                              |
|------------------------------------------|-----------------------|--------------------------------------------------------------------------------------------------------------------------|---------------------------------------------------------------------------------------------------------------------------------------|-----------------------------------|--------------------------------------------------------|----------------------|------------------------------------------------------------------------------------------------------------------------------------|------------------------------------------------------------------------------------------------------------------------|------------------------------------------------------------------------------|
| 2020 <sup>68</sup><br>Suiza              | retrospectiva         | años egresados de tres unidades oncológicas                                                                              | expedientes y análisis de datos con GTT adaptada                                                                                      | acuerdo por pares                 | TI=107<br>EA/1000dp<br><br>75.4<br>EA/100<br>ingresos  |                      | intervención médica<br>30.3% daño temporal<br>2.2%                                                                                 | Hiatt (Implícito)                                                                                                      | 17% indeterminados<br>61% no prevenibles                                     |
| Nazer, 2014 <sup>71,72</sup><br>Jordania | Cohorte prospectiva   | Pacientes oncológicos adultos en terapia intensiva de un hospital de tercer nivel                                        | Seguimiento día a día por con GTT por un intensivista, farmacéutico y oncólogo. Reporte voluntario anónimo. Y Análisis en dos etapas. | Escala de probabilidad de Naranjo | TI=96.5<br>EA/1000dp<br><br>35.3<br>EA/100<br>ingresos | Criterios propios.   | 64.8% ponen en riesgo la vida<br>34.1% significativos<br>1.1% fatales                                                              | Acuerdo en revisión independiente por dos intensivistas. (Implícito)                                                   | 15.9%-17.5% prevenibles                                                      |
| Stockwell, 2018 <sup>80</sup><br>EEUU    | Cohorte retrospectiva | Pacientes pediátricos de 16 hospitales en 4 regiones geográficas de EEUU                                                 | Análisis de datos electrónicos con GAPPS en dos etapas.                                                                               | Revisión y acuerdo por pares.     | TI=19<br>EA/1000dp<br><br>10.9<br>EA/100<br>ingresos   | NCCMERP              | 52.7% requirió intervención médica<br>35.3% daño temporal<br>1.2% daño permanente<br>10.1% pone en peligro la vida<br>0.7% fatales | Criterios propios en revisión independiente por pares a partir de una escala tipo Likert de cuatro puntos. (implícito) | 50.7% prevenibles                                                            |
| Wahlang JB, 2017 <sup>76</sup><br>India  | Cohorte prospectiva   | Pacientes oncológicos de un hospital de tercer nivel                                                                     | Vigilancia activa y revisión de expedientes                                                                                           | Escala de probabilidad de Naranjo | IA=58.8%<br>EAM                                        | Escala Hartwig Sigel | 77.4% leves<br>18.9% moderados<br>3.8% severos                                                                                     | Criterios Schumock-Thornton (Explícito)                                                                                | 45.3% prevenibles<br>54.7% no prevenibles                                    |
| Ramasubbu, 2020 <sup>77</sup><br>India   | Cohorte prospectiva   | Pacientes recién diagnosticados con cáncer hematológico y no hematológico que recibieron quimioterapia en un hospital de | Vigilancia activa y revisión de expedientes                                                                                           | Escala de probabilidad de Naranjo | IA=46.6%<br>EAM                                        | Escala Hartwig Sigel | 11.6% leves<br>80.2% moderados<br>8.2% severos                                                                                     | Criterios Schumock-Thornton (Explícito)                                                                                | 13.2% prevenibles<br>13.6% probablemente prevenibles<br>73.2% no prevenibles |

|                            |                       |                                                                                                   |                                                     |                                   |      |                      |                                             |                                         |                                                                           |
|----------------------------|-----------------------|---------------------------------------------------------------------------------------------------|-----------------------------------------------------|-----------------------------------|------|----------------------|---------------------------------------------|-----------------------------------------|---------------------------------------------------------------------------|
|                            |                       | tercer nivel.                                                                                     |                                                     |                                   |      |                      |                                             |                                         |                                                                           |
| Sharma, 2015 <sup>78</sup> | Cohorte retrospectiva | Pacientes oncológicos en un hospital de tercer nivel recibiendo quimioterapia que presentaron EAM | Revisión de expedientes por oncólogos y residentes. | Escala de probabilidad de Naranjo | n.r. | Escala Hartwig Sigel | 30.6% leves<br>61.4% moderadas<br>6% severo | Criterios Schumock-Thornton (Explícito) | 30.8% prevenible<br>3.8% probablemente prevenibles<br>65.4% no prevenible |

Abreviaturas. CTCAE: Common Terminology Criteria for Adverse Events, dp: días-paciente, EA: eventos adversos, EEUU: Estados Unidos, GTT: global trigger tool, HMPS: Harvard Medical Practice Study, IA, incidencia acumulada, n.a.: no aplica, NCCMERP: National Coordinating Council for Medication Error Reporting and Prevention, n.r: no reportado, NCI: National Cancer Institute, TI: tasa de incidencia,

256  
257  
258  
259  
260  
261  
262  
263  
264  
265  
266  
267  
268  
269  
270  
271  
272  
273  
274  
275  
276  
277  
278  
279  
280  
281  
282  
283  
284

## PLANTEAMIENTO DEL PROBLEMA

Los pacientes pediátricos recién diagnosticados con LLA sufren frecuentemente de EA asociados al manejo médico del cáncer. Estos EA representan una pesada carga física y psicológica para los pacientes y sus familias. Además, en México estos pacientes presentan una mortalidad elevada durante la fase de inducción a la remisión de quimioterapia, lo cual es motivo de atención porque no se ha reducido por décadas.

En la actualidad se busca poner mayor énfasis en la calidad de la atención que reciben estos pacientes. Se ha mostrado que durante la fase de inducción a la remisión ocurren fallas en el sistema de medicación que comprometen la seguridad de quimioterapia y pueden contribuir en la aparición de EAM prevenibles hasta en 12.2% de los pacientes en esta fase de terapia, algunos de los cuales podrían contribuir en la mortalidad. Pero también otros procesos de atención pueden producir daño involuntario sobre el paciente cuando no se cumplen los mejores estándares de calidad y seguridad alcanzables en el contexto en que se presta la atención, como los procedimientos médicos invasivos o quirúrgicos, así como deficiencias en el cuidado y prevención de infecciones adquiridas en el hospital, los cuales son prioridades para la seguridad del paciente.

Sin embargo, en México no hay estudios que evalúen la prevenibilidad, severidad y frecuencia de los EA que se presentan en pacientes pediátricos con LLA. A nivel internacional, pocos estudios se han enfocado en la descripción de la prevenibilidad de los EA entre pacientes con enfermedades oncológicas, y sus estimaciones son ampliamente variables por las diferencias en el diseño de los estudios, la disponibilidad de múltiples instrumentos para medir la prevenibilidad de EA, pero sobre todo los tipos de pacientes y regímenes de quimioterapia predominantes de un estudio a otro. Por lo cual es necesario que se estudien los patrones locales, a fin de identificar procesos de atención con posibilidades de mejorar la seguridad del paciente y la calidad de los servicios hacia este grupo de pacientes.

285

## PREGUNTA DE INVESTIGACIÓN

286

287 ¿Cuál es la incidencia de los EA asociados al cuidado de la salud por su tipo, severidad y  
288 prevenibilidad, que se presentan en pacientes pediátricos con LLA durante la terapia de inducción  
289 a la remisión en el Hospital Infantil de México Federico Gómez (HIMFG)?

290

291

## JUSTIFICACIÓN

292

293 Este estudio epidemiológico sobre EA permitirá identificar la proporción prevenible del daño  
294 asociado al manejo médico de la LLA que se produce sobre pacientes pediátricos durante la  
295 inducción a la remisión. El enfoque centrado en la prevenibilidad de los EA busca aspectos del  
296 cuidado donde los mejores estándares de atención alcanzables presentan deficiencias en su  
297 aplicación u organización, y proponer medidas de mejora de la calidad y la seguridad del  
298 paciente.

299 La inducción a la remisión es una fase crítica en la terapia contra LLA, en la cual se manifiesta la  
300 actividad de la enfermedad al mismo tiempo que se experimenta la carga de efectos citotóxicos e  
301 inmunosupresores de la quimioterapia, y en cuyo periodo se concentra una elevada tasa de  
302 mortalidad asociada al tratamiento en México y América Latina. Por lo cual, estimar la fracción  
303 prevenible del daño al paciente, permitirá identificar oportunidades de reducción de la morbilidad  
304 y mortalidad asociada al manejo de su enfermedad, traduciéndose en mejoras sobre la seguridad  
305 de los pacientes y la mejora en los servicios de atención.

306

307

## OBJETIVOS

308

309 Objetivo primario

310 Estimar la incidencia de los EA asociados al cuidado de la salud por su tipo, severidad y  
311 prevenibilidad, que se presentan en pacientes pediátricos con LLA durante la terapia de inducción  
312 a la remisión en el HIMFG.



313 **Objetivos secundarios**

- 314 – Determinar la presencia de EA asociados al cuidado de la salud durante la terapia de  
315 inducción a la remisión de pacientes pediátricos con LLA en el HIMFG.
- 316 – Clasificar los EA asociados al cuidado de la salud en tres tipos: asociados a  
317 medicamentos, asociados al cuidado hospitalario, y asociados a procedimientos médicos o  
318 quirúrgicos.
- 319 – Determinar el grado de severidad de los EA identificados en la cohorte.
- 320 – Determinar el grado de prevenibilidad de los EA identificados en la cohorte.

321

322 **MÉTODOS.**

323

324 **Diseño de estudio.**

325 Cohorte retrolectiva de expedientes clínicos.

326 **Población de estudio.**

327 Pacientes pediátricos con LLA diagnosticados y atendidos en el HIMFG.

328 **Marco muestral.**

329 Expedientes clínicos de pacientes pediátricos con LLA diagnosticados y tratados en el HIMFG

330 durante la fase de inducción a la remisión, entre el 01 de enero de 2015 y el 31 de diciembre de

331 2017 que formaron parte del estudio HIM-2018-018, “Evaluación de Errores de Medicación

332 durante el Tratamiento de Inducción a la Remisión en Pacientes Pediátricos con Leucemia

333 Linfoblástica Aguda”, el cual contó con la aprobación de los Comités de Investigación, Ética y

334 Bioseguridad del HIMFG.

335 **Unidad de muestreo.**

336 Expedientes clínicos de pacientes con LLA.

337

338 **Criterios de selección.**

339 *Criterios de inclusión:*

- 340 – Registros clínicos de pacientes menores de 18 años
- 341 – Diagnosticados con LLA *de novo* entre el 01 de enero de 2015 y el 31 de diciembre de 2017
- 342 – Que cuenten con información de manejo médico desde la fecha de primer ingreso por
- 343 sospecha de LLA hasta el día 28 de inducción a la remisión o la defunción del paciente.
- 344 – Que cuenten con los registros fechados al menos del 90% de los fármacos
- 345 quimioterapéuticos y no quimioterapéuticos prescritos y administrados durante la inducción
- 346 a la remisión (excluyendo soluciones fisiológicas sin electrolitos de alto riesgo).
- 347 – Que cuenten con registros fechados y descripciones legibles de las intervenciones quirúrgicas
- 348 o procedimiento invasivo que requirieron anestesia local o general y que hayan sido
- 349 realizados dentro del HIMFG como parte del manejo de LLA.
- 350 – Registros completos y consistentemente fechados, en mínimo 90% de las notas de evolución
- 351 en hospitalización, interconsultas de especialidades, notas de consulta ambulatoria, así como
- 352 resultados impresos de exámenes clínicos y paraclínicos realizados durante la inducción a la
- 353 remisión.

354 *Criterios de exclusión:*

- 355 – Registros clínicos de pacientes sin diagnóstico concluyente de LLA o con diagnósticos
- 356 distintos.
- 357 – Registros clínicos de pacientes con LLA diagnosticados en el HIMFG que fueron trasladados
- 358 a otras instituciones para su manejo durante la inducción a la remisión.
- 359 – Registros incompletos o trancos por abandono del paciente.

- 360 – Registros no encontrados en el departamento de bioestadística del HIMFG.
- 361 – Registros de pacientes con diagnóstico de LLA que fallecen por complicaciones propias de la
- 362 LLA antes de iniciar la ventana de esteroides con dexametasona o prednisona.
- 363 – Pacientes previamente libres de la enfermedad que presentan recaída de LLA y reciben
- 364 esquemas de reinducción a la remisión de muy alto riesgo.

365

366 **Diseño de la muestra.**

367 *Método de muestreo:* no probabilístico a conveniencia.

368 *Tamaño de muestra:* se incluyen todos los registros de pacientes en la cohorte que cumplan

369 criterios de inclusión en el periodo de estudio buscando maximizar la potencia estadística.

370

371 **Variables de estudio**

| Cuadro 2. Definición de variables. |                                                                                                                                                                                                                                                                                                                                                                                                                                                                                                                                                                                                                                                                                                                                                                            |
|------------------------------------|----------------------------------------------------------------------------------------------------------------------------------------------------------------------------------------------------------------------------------------------------------------------------------------------------------------------------------------------------------------------------------------------------------------------------------------------------------------------------------------------------------------------------------------------------------------------------------------------------------------------------------------------------------------------------------------------------------------------------------------------------------------------------|
| Evento adverso                     | <p><b>Definición conceptual:</b> Daño o perjuicio no intencionado relacionado temporalmente al manejo médico, en lugar de complicaciones por el avance de una enfermedad subyacente<sup>7-9</sup>.</p> <p><b>Definición operacional:</b> Daño ocurrido al paciente identificado en registros clínicos y determinado por expertos como asociado al cuidado de la salud. Se pueden observar más de un EA por cada paciente en distintos momentos durante la inducción a la remisión.</p> <p><b>Tipo de variable:</b> Cualitativa.</p> <p><b>Escala de variable:</b> Nominal dicotómica (presente/ausente).</p>                                                                                                                                                               |
| Tipo de evento adverso.            | <p><b>Definición conceptual:</b> Clasificación basada en la causa asociada al EA.</p> <p><b>Definición operacional:</b> Se distinguirán tres tipos de EA en función de su causa asociada:</p> <ul style="list-style-type: none"> <li>– EAM: respuestas nocivas documentadas hacia un medicamento utilizado con fines profilácticos, terapéuticos o diagnósticos (incluyendo RAMs) y que pueden ocurrir en presencia de EM en cualquier etapa del proceso de medicación.</li> <li>– EA asociados a procedimientos o cirugías: cuando se documente algún tipo de daño durante la ejecución técnica de un procedimiento invasivo planeado<sup>81,82</sup> (por ejemplo: punciones lumbares, inserción de catéteres centrales, aspirados de médula ósea, cirugías).</li> </ul> |

|                |                                                                                                                                                                                                                                                                                                                                                                                                                                                                                                                                                                                                                                                                                                                                                                                                                                                                                                                                                                                                                                                                                                                                                                                                                                                                                                                                                                                                                                                                                                                      |
|----------------|----------------------------------------------------------------------------------------------------------------------------------------------------------------------------------------------------------------------------------------------------------------------------------------------------------------------------------------------------------------------------------------------------------------------------------------------------------------------------------------------------------------------------------------------------------------------------------------------------------------------------------------------------------------------------------------------------------------------------------------------------------------------------------------------------------------------------------------------------------------------------------------------------------------------------------------------------------------------------------------------------------------------------------------------------------------------------------------------------------------------------------------------------------------------------------------------------------------------------------------------------------------------------------------------------------------------------------------------------------------------------------------------------------------------------------------------------------------------------------------------------------------------|
|                | <ul style="list-style-type: none"> <li>– EA asociados al cuidado hospitalario: cuando se documenten daños por falta de cumplimiento de estándares internacionales de seguridad del paciente durante el manejo hospitalario (por ejemplo: caídas, infecciones adquiridas en el hospital).</li> </ul> <p><b>Tipo de variable:</b> Cualitativa.<br/> <b>Escala de variable:</b> Nominal politómica.</p>                                                                                                                                                                                                                                                                                                                                                                                                                                                                                                                                                                                                                                                                                                                                                                                                                                                                                                                                                                                                                                                                                                                 |
| Severidad      | <p><b>Definición conceptual:</b> Intensidad de un evento clínico independientemente de su etiología<sup>19</sup>.</p> <p><b>Definición operacional:</b> El grado asignado por revisores expertos aplicando los criterios de la CTCAE versión 5<sup>36</sup> desarrollados por el el <i>National Cancer Institute</i>. Se podrá asignar el nivel más alto alcanzado por cada EA identificado en cinco grados de severidad:</p> <ul style="list-style-type: none"> <li>– Grado 1 (leve): observaciones clínicas o diagnósticas, signos de laboratorio asintomáticos o síntomas leves que no requieren intervención médica.</li> <li>– Grado 2 (moderado): manifestaciones que requieren intervenciones mínimas, locales o no invasivas.</li> <li>– Grado 3 (severo): requieren o prolongan la hospitalización o son incapacitantes.</li> <li>– Grado 4 (amenaza la vida): cuando se requiere una intervención médica urgente.</li> <li>– Grado 5 (mortal): cuando la muerte está relacionada al EA.</li> </ul> <p><b>Tipo de variable:</b> Cualitativa.<br/> <b>Escala de variable:</b> Ordinal.</p>                                                                                                                                                                                                                                                                                                                                                                                                                   |
| Prevenibilidad | <p><b>Definición conceptual:</b> Daño que se puede evitar siguiendo un estándar de práctica médica en base al estado de conocimiento actual<sup>43</sup>.</p> <p><b>Definición operacional:</b> Se aplicará la escala y criterios adaptados de Gandhi<sup>130,40,41</sup> para determinar el grado de prevenibilidad de los EA observados por revisores expertos en oncología pediátrica. Se distinguen tres categorías originales y una cuarta adaptada: EA prevenibles, EA mitigables, EA no prevenibles y EA no evaluables.</p> <ul style="list-style-type: none"> <li>– Un AE se considerará prevenible si fue resultado de una atención clínica inconsistente con la práctica oncológica estándar, o como una complicación relacionada con el tratamiento que pudo ser anticipada de acuerdo con el estado de la evidencia conocida.</li> <li>– Se considerarán EA mitigables o mejorables aquellos AE cuya severidad o duración se pudo haber reducido considerablemente, si se hubieran tomado acciones distintas, incluyendo aquellas que están más allá de las posibilidades de atención actuales del hospital.</li> <li>– Los EA no evaluables serán aquellos EA cuyo contexto no sea suficientemente detallado en los registros, o se carezca de información importante para que los expertos emitan un juicio sobre su prevenibilidad.</li> <li>– Los EA no prevenibles serán todos aquellos que no cumplan ninguno de los criterios anteriores.</li> </ul> <p><b>Tipo de variable:</b> Cualitativa.</p> |

|                            |                                                                                                                                                                                                                                                                                                                                                                                                                                                                                                                                                                                                                                                                                                                                                                                                                                                       |
|----------------------------|-------------------------------------------------------------------------------------------------------------------------------------------------------------------------------------------------------------------------------------------------------------------------------------------------------------------------------------------------------------------------------------------------------------------------------------------------------------------------------------------------------------------------------------------------------------------------------------------------------------------------------------------------------------------------------------------------------------------------------------------------------------------------------------------------------------------------------------------------------|
|                            | <b>Escala de variable:</b> Ordinal.                                                                                                                                                                                                                                                                                                                                                                                                                                                                                                                                                                                                                                                                                                                                                                                                                   |
| Covariables                |                                                                                                                                                                                                                                                                                                                                                                                                                                                                                                                                                                                                                                                                                                                                                                                                                                                       |
| Sexo                       | <p><b>Definición conceptual:</b> Condición orgánica que distingue al varón de la mujer.</p> <p><b>Definición operacional:</b> se tomará el sexo registrado en la base de datos y que proviene del expediente clínico particular de cada paciente.</p> <p><b>Tipo de variable:</b> Cualitativa</p> <p><b>Escala de medición:</b> Nominal dicotómica (masculino/femenino)</p>                                                                                                                                                                                                                                                                                                                                                                                                                                                                           |
| Grupo de edad              | <p><b>Definición conceptual:</b> Etapa de desarrollo que comprende el tiempo de vida transcurrido entre el nacimiento y el momento del diagnóstico.</p> <p><b>Definición operacional:</b> la edad en años, meses y días cumplidos registrada en la base de datos y asentada en la nota médica inicial del expediente al momento del diagnóstico será transformada en categorías en base a los siguientes criterios:</p> <ul style="list-style-type: none"> <li>- Neonatos: 0 a 28 días.</li> <li>- Infantes: 29 días a &lt; 2.0 años.</li> <li>- Niños: <math>\geq 2.0</math> años a &lt;12.0 años</li> <li>- Adolescentes: <math>\geq 12.0</math> años a &lt;18.0 años</li> </ul> <p><b>Tipo de variable:</b> Cualitativa</p> <p><b>Escala de medición:</b> Ordinal.</p>                                                                             |
| Inmunofenotipo             | <p><b>Definición conceptual:</b> Tipo de célula diferenciada de origen linfoide que distingue a la leucemia en el torrente sanguíneo.</p> <p><b>Definición operacional:</b> Se consignará el fenotipo reportado en el expediente obtenido de la prueba de inmunofenotipo realizada al momento del diagnóstico de la leucemia y registrada en la base de datos, la cual comprende las siguientes:</p> <ul style="list-style-type: none"> <li>- Linfocitos B</li> <li>- Linfocitos T</li> <li>- Mixto o indefinido</li> </ul> <p><b>Tipo de variable:</b> Cualitativa.</p> <p><b>Escala de medición:</b> Nominal politómica.</p>                                                                                                                                                                                                                        |
| Conteo de glóbulos blancos | <p><b>Definición conceptual:</b> Es el número de glóbulos blancos en sangre denominados leucocitos.</p> <p><b>Definición operacional:</b> Se recogerá el número de leucocitos por unidad de volumen expresado en número de células <math>\times 10^9/L</math> y reportado en el expediente clínico o en la biometría hemática al momento del diagnóstico. El valor registrado en la base de datos será transformado de escala cuantitativa continua a cuatro categorías tal como sigue:</p> <ul style="list-style-type: none"> <li>- <math>&lt; 10 \times 10^9/L</math></li> <li>- <math>10</math> a <math>49.99 \times 10^9/L</math></li> <li>- <math>50</math> a <math>99.99 \times 10^9/L</math></li> <li>- <math>\geq 100 \times 10^9/L</math></li> </ul> <p><b>Tipo de variable:</b> Cualitativa.</p> <p><b>Escala de medición:</b> Ordinal.</p> |
| Clasificación de riesgo    | <p><b>Definición conceptual:</b> Clasificación de riesgo que guía la intensidad del tratamiento de inducción a la remisión.</p>                                                                                                                                                                                                                                                                                                                                                                                                                                                                                                                                                                                                                                                                                                                       |

|                                                |                                                                                                                                                                                                                                                                                                                                                                                                                                                                                                                                                                                                                                                                                                                                                                                                                                                                                                                |
|------------------------------------------------|----------------------------------------------------------------------------------------------------------------------------------------------------------------------------------------------------------------------------------------------------------------------------------------------------------------------------------------------------------------------------------------------------------------------------------------------------------------------------------------------------------------------------------------------------------------------------------------------------------------------------------------------------------------------------------------------------------------------------------------------------------------------------------------------------------------------------------------------------------------------------------------------------------------|
|                                                | <p><b>Definición operacional:</b> se utilizará la clasificación de riesgo desarrollada por el <i>National Cancer Institute</i> con los datos registrados al momento del diagnóstico de acuerdo con los siguientes criterios:</p> <ul style="list-style-type: none"> <li>– Riesgo habitual: edad de 1 a 9.9 años, conteo inicial de glóbulos blancos <math>&lt; 50 \times 10^9/L</math>.</li> <li>– Riesgo alto: edad <math>\geq 10</math> años y <math>&lt; 1</math> año, conteo inicial de glóbulos blancos <math>\geq 50 \times 10^9/L</math>.</li> </ul> <p><b>Tipo de variable:</b> Cualitativa.<br/> <b>Medición:</b> Nominal dicotómica.</p>                                                                                                                                                                                                                                                             |
| <i>Morfología celular de la leucemia</i>       | <p><b>Definición conceptual:</b> <i>La caracterización morfológica predominante de las células leucémicas.</i></p> <p><b>Definición operacional:</b> <i>Se consignará la morfología celular reportada en el expediente como parte de la caracterización de la leucemia: L1, L2, L3.</i></p> <p><b>Tipo de variable:</b> <i>Cualitativa</i><br/> <b>Escala de medición:</b> <i>Nominal politómica.</i></p>                                                                                                                                                                                                                                                                                                                                                                                                                                                                                                      |
| <i>Citogenética (transcriptos moleculares)</i> | <p><b>Definición conceptual:</b> <i>Alteraciones genéticas distintivas de las células leucémicas asociadas con el pronóstico en niños con leucemia linfoblástica aguda.</i></p> <p><b>Definición operacional:</b> <i>Se consignarán aquellas alteraciones genéticas reportadas positivas en estudios de citogenética por PCR en el expediente tras el diagnóstico de leucemia, dividiéndolas en los grupos siguientes:</i></p> <ul style="list-style-type: none"> <li>– <i>t(9;22)</i></li> <li>– <i>t(4;11)</i></li> <li>– <i>t(1;19)</i></li> <li>– <i>t(8;21) AML1-ETO</i></li> <li>– <i>t(15;17) PLM-RAR</i></li> </ul> <p><b>Tipo de variable:</b> <i>Cualitativa</i><br/> <b>Escala de medición:</b> <i>Nominal politómica.</i></p>                                                                                                                                                                      |
| <i>Estatus de líquido cefalorraquídeo</i>      | <p><b>Definición conceptual:</b> <i>La presencia de células leucémicas en líquido cefalorraquídeo.</i></p> <p><b>Definición operacional:</b> <i>Se recogerá el resultado obtenido del análisis de las muestras de punción lumbar al momento del diagnóstico y al finalizar la inducción a la remisión. Se clasificará de la siguiente manera el resultado:</i></p> <ul style="list-style-type: none"> <li>– <i>Positivo: presencia de células leucémicas en una punción lumbar no traumática.</i></li> <li>– <i>Hemorrágico: cuando se documenta una hemorragia interna por la evolución de la enfermedad.</i></li> <li>– <i>Traumático: cuando como resultado del procedimiento de punción lumbar se obtiene LCR sanguinolento.</i></li> <li>– <i>Negativo: ausencia de blastos.</i></li> </ul> <p><b>Tipo de variable:</b> <i>Cualitativa</i><br/> <b>Escala de medición:</b> <i>Nominal politómica.</i></p> |
| <i>Remisión</i>                                | <p><b>Definición conceptual:</b> <i>La reducción de la carga de células leucémicas en médula ósea por debajo de niveles morfológicamente detectables con recuperación de la hematopoyesis normal.</i></p> <p><b>Definición operacional:</b> <i>Se considerará remisión completa cuando los</i></p>                                                                                                                                                                                                                                                                                                                                                                                                                                                                                                                                                                                                             |

|                                       |                                                                                                                                                                                                                                                                                                                                                                                                                                                                                                                                                                                                                                                                                                                                                                                                                                                                                                                                        |
|---------------------------------------|----------------------------------------------------------------------------------------------------------------------------------------------------------------------------------------------------------------------------------------------------------------------------------------------------------------------------------------------------------------------------------------------------------------------------------------------------------------------------------------------------------------------------------------------------------------------------------------------------------------------------------------------------------------------------------------------------------------------------------------------------------------------------------------------------------------------------------------------------------------------------------------------------------------------------------------|
|                                       | <p><i>registros del paciente cumpla las siguientes condiciones:</i></p> <ul style="list-style-type: none"> <li>- <i>Aspirado de médula ósea &lt; 5% de blastos</i></li> <li>- <i>Ausencia de blastos en líquido cefalorraquídeo</i></li> <li>- <i>Neutrófilos <math>\geq 1.5 \times 10^9/L</math></i></li> <li>- <i>Plaquetas <math>&gt; 100 \times 10^9/L</math></i></li> </ul> <p><i>Reportados el día 14, 21, 28 o 35 de la inducción.</i></p> <p><b>Tipo de variable:</b> Cualitativa</p> <p><b>Escala de medición:</b> Nominal dicotómica (en remisión/ sin remisión)</p>                                                                                                                                                                                                                                                                                                                                                         |
| Comorbilidades                        | <p><b>Definición conceptual:</b> Padecimientos concomitantes en el paciente al momento del diagnóstico de leucemia que no son complicaciones de la misma.</p> <p><b>Definición operacional:</b> Se contabilizará el número de afecciones antecedentes al diagnóstico de LLA, que fueron registradas en la base de datos de la cohorte, y que provienen de la historia clínica elaborada durante la primera hospitalización para diagnóstico. El número de comorbilidades será agrupado de la siguiente manera:</p> <ul style="list-style-type: none"> <li>- Sin comorbilidades (0 antecedentes)</li> <li>- Con comorbilidades (uno o más antecedentes independientes)</li> </ul> <p><b>Escala de medición:</b> Cualitativa.</p> <p><b>Escala de medición:</b> Nominal dicotómica.</p>                                                                                                                                                  |
| Puntaje Z del índice de masa corporal | <p><b>Definición conceptual:</b> Razón entre el peso y la talla que se transforma en desviaciones estándar (DE) de la distribución Z por edad.</p> <p><b>Definición operacional:</b> se calculará el índice de masa corporal (IMC) transformado en desviaciones estándar del puntaje Z de cada paciente utilizando el software WHO AnthroPlus. Para su análisis se utilizarán las variables: edad (meses), sexo, peso (kg), talla (cm), fecha de diagnóstico y fecha de nacimiento. Los valores en escala continua calculados por AntroPlus serán agrupados de la siguiente manera:</p> <ul style="list-style-type: none"> <li>- Desnutrición: <math>&lt; -1</math> DE</li> <li>- Normopeso: <math>-1 \geq z \leq +1</math> DE</li> <li>- Sobrepeso: <math>+2 \geq z &gt; +1</math> DE</li> <li>- Obesidad: <math>&gt; +2</math> DE</li> </ul> <p><b>Tipo de variable:</b> Cualitativa.</p> <p><b>Escala de medición:</b> Ordinal.</p> |
| Respuesta al corticosteroide          | <p><b>Definición conceptual:</b> Reducción de la carga de blastos en sangre periférica.</p> <p><b>Definición operativa:</b> Se tomará el registro tomado de los expedientes clínicos en el día 8 de recibir la ventana de esteroides (dexametasona o prednisona). En base a la biometría hemática realizada ese día, el resultado podrá ser:</p> <ul style="list-style-type: none"> <li>- Buena respuesta: <math>&lt; 1000</math> blastos en sangre periférica</li> <li>- Mala respuesta: <math>\geq 1000</math> blastos en sangre periférica</li> <li>- Incierto: en caso de no haber biometría hemática disponible.</li> </ul> <p><b>Tipo de variable:</b> Cualitativa.</p> <p><b>Escala:</b> Nominal.</p>                                                                                                                                                                                                                           |
| Número de                             | <p><b>Definición conceptual:</b> Número de ingresos hospitalarios por EA durante la</p>                                                                                                                                                                                                                                                                                                                                                                                                                                                                                                                                                                                                                                                                                                                                                                                                                                                |

|                                         |                                                                                                                                                                                                                                                                                                                                                                                                                                                                                                                                                                                 |
|-----------------------------------------|---------------------------------------------------------------------------------------------------------------------------------------------------------------------------------------------------------------------------------------------------------------------------------------------------------------------------------------------------------------------------------------------------------------------------------------------------------------------------------------------------------------------------------------------------------------------------------|
| hospitalizaciones                       | <p>terapia de inducción a la remisión.</p> <p><b>Definición operativa:</b> Se contabilizará cada reingreso hospitalario por EA con una duración mayor a 24 horas durante la inducción a la remisión. Los reingresos por complicaciones originadas en hospitalizaciones previas serán contabilizados de manera independiente.</p> <p><b>Tipo de variable:</b> Cuantitativa de razón.</p> <p><b>Escala:</b> Discreta (ingresos hospitalarios).</p>                                                                                                                                |
| Duración de la estancia hospitalaria    | <p><b>Definición conceptual:</b> Tiempo transcurrido entre el ingreso y egreso de hospitalización.</p> <p><b>Definición operativa:</b> Se contabilizará el número de días que transcurren entre los ingresos y egresos de hospitalización mientras el paciente se encuentre bajo manejo médico en la fase de inducción a la remisión. La suma de los días de todos los ingresos hospitalarios dará la duración total de la estancia hospitalaria en esta fase de tratamiento.</p> <p><b>Tipo de variable:</b> Cuantitativa de razón.</p> <p><b>Escala:</b> Discreta (días).</p> |
| Duración de la inducción a la remisión. | <p><b>Definición conceptual:</b> Tiempo que transcurre entre el inicio de la venta de esteroides y el final de la inducción a la remisión.</p> <p><b>Definición operativa:</b> Se contabilizará el número de días que transcurren desde el día en que el paciente recibe la primera dosis de esteroide (dexametasona o prednisona) hasta la fecha en que recibe la última dosis de vincristina y L-asparaginasa ordenada por el médico tratante.</p> <p><b>Tipo de variable:</b> Cuantitativa de razón.</p> <p><b>Escala:</b> Discreta (días).</p>                              |

372

### 373 **Procedimiento.**

374 *Base de datos de la cohorte original.*

375 La revisión de los expedientes clínicos para la construcción de esta cohorte se realizó entre 2018

376 y 2019 como parte del estudio HIM-2018-018<sup>70</sup>. Se obtuvieron los listados de pacientes

377 diagnosticados con LLA entre enero de 2015 y diciembre de 2017 en el Departamento de

378 Bioestadística del HIMFG.

379 La base de datos contiene variables demográficas de los pacientes, historia clínica previa,

380 resultados del proceso diagnóstico de LLA y de evolución clínica con resultados de pruebas

381 clínicas y paraclínicas realizadas durante la inducción a la remisión, además contiene variables

382 que describen del manejo farmacológico quimioterapéutico y no quimioterapéutico: nombre del

383 medicamento, posología, dosis, vías de administración, periodicidad, fechas de prescripción y



384 administración y la duración *del protocolo de inducción a la remisión del HIMFG, el cual está*  
385 *basado en el Protocolo XIII del San Jude Hospital*<sup>83</sup>, así como el análisis de errores de  
386 medicación en las etapas de prescripción, transcripción y administración de los medicamentos.  
387 También incluye fechas de ingreso y egreso de cada hospitalización, junto con las causas de los  
388 reingresos hospitalarios (esto es, medicamentos, procedimientos médicos, cuidados en  
389 hospitalizaciones previas) se documentaron tan exhaustivamente cómo fue posible dada la  
390 naturaleza retrospectiva de la cohorte original, de tal manera que se cuenta con resultados de  
391 pruebas de laboratorio, observaciones en notas de interconsulta de especialidades, notas de  
392 enfermería, notas de evaluación médica, y medicación potencialmente asociada con EA, desde el  
393 primer ingreso al hospital para diagnóstico, hasta el final de la terapia de inducción a la remisión  
394 o fallecimiento del paciente. En caso de fallecimiento se cuenta con datos del certificado o acta  
395 de defunción anexo al expediente donde se especifican causas primarias y secundarias de  
396 fallecimiento, así como la fecha de muerte.

#### 397 *Identificación de los eventos adversos.*

398 Los investigadores responsables del estudio invitarán de manera formal e independiente a dos  
399 oncólogos pediatras expertos en la atención de pacientes dentro del HIMFG, para participar como  
400 revisores expertos en la evaluación de EA, explicando los objetivos y alcances del estudio. Al  
401 aceptar participar en la revisión de los casos, se organizará una sesión de capacitación e  
402 información con cada oncólogo pediatra para ser capacitados en la aplicación de las escalas  
403 mencionadas para este estudio, es decir: la taxonomía CTCAE versión cinco para determinar el  
404 grado de severidad de los EA, así como los criterios de Gandhi y sus categorías de  
405 prevenibilidad. En esta sesión se resolverán dudas sobre el protocolo de estudio y se establecerán  
406 las vías de intercambio de información y comunicación con los investigadores responsables.

407 Para la identificación de los EA contenidos en la base de datos, se elaborarán resúmenes de cada  
408 paciente incluido en la cohorte describiendo el manejo de eventos médicos documentados, así  
409 como información sobre el tratamiento farmacológico administrado, evaluación de errores de  
410 medicación, diagnósticos de ingreso hospitalario y la duración de cada hospitalización,  
411 procedimientos quirúrgicos realizados, así como acciones médicas registradas en la base de datos,  
412 desde el ingreso hasta el final del seguimiento en la cohorte. Tales resúmenes se harán llegar vía  
413 electrónica a los revisores expertos, quienes evaluarán de manera independientemente los casos  
414 enviados.

#### 415 *Evaluación independiente por expertos.*

416 Los revisores expertos emitirán un juicio sobre la presencia o ausencia de EA asociados al  
417 cuidado de la salud durante el manejo de inducción a la remisión. En todos los casos donde  
418 emitan un juicio afirmativo a la presencia de uno o más EA, se indicará la causa más probable.

419 Para esto, los revisores expertos podrán pedir mayor información sobre periodos o eventos  
420 específicos de la evolución clínica de cualquier caso enviado. Los investigadores serán los  
421 responsables de enviar la información requerida, en caso de no existir más información que  
422 proporcionar se informará a los revisores para que emitan su juicio.

423 Una vez que los revisores clasifiquen los EA en base a la terminología CTCAE deberán elegir la  
424 severidad del evento en base a los criterios CTCAE y su prevenibilidad con los criterios de  
425 Gandhi. Una vez evaluados los casos, los revisores expertos enviarán de vuelta vía correo  
426 electrónico sus resultados. Los investigadores responsables descargarán las variables de presencia  
427 de EA, tipo de EA, severidad y prevenibilidad con el grado asignado por los revisores en una sola  
428 base de datos en una hoja de cálculo de Microsoft Excel que identifique con una clave al paciente  
429 que pertenecen. Los datos serán ordenados y se medirá el grado de concordancia entre  
430 evaluadores. Aquellos EA donde los revisores no coincidieron en la evaluación de la primera

431 etapa serán discutidos hasta alcanzar un consenso, con la mediación del investigador responsable  
432 por video llamada. En caso de no alcanzar un consenso, uno de los investigadores tomará la  
433 decisión actuando como tercer revisor.

#### 434 **Diseño estadístico.**

435 *Verificación de registros.*

436 *Análisis descriptivo.* Las variables cualitativas se expresarán como frecuencias relativas y  
437 porcentajes. Por otro lado, se estudiarán las distribuciones de las variables cuantitativas a través  
438 de la asimetría (-1 a +1) y la curtosis (-1 a +1), obteniendo así estimaciones de tendencia central y  
439 dispersión: media ( $\bar{x}$ ) y desviación estándar para variables continuas con distribución normal, y  
440 mediana (me) y rango intercuartílico (RI) para variables con distribución libre. No se imputarán  
441 datos faltantes.

442 *Confiabilidad entre revisores.* Se utilizará la prueba de kappa de Cohen (k) para evaluar el  
443 acuerdo entre los revisores expertos en la determinación de EA. Además, se utilizará la prueba de  
444 kappa ponderada ( $k_w$ ) para medir el grado de acuerdo al asignar el grado de severidad, y  
445 prevenibilidad de los EA identificados. Los tres coeficientes resultantes serán expresados como  
446 porcentaje.

447 *Estimación de tasas de incidencia.* Se estimarán las tasas de incidencia de los EA por tipo,  
448 severidad, y prevenibilidad cada 1000 días-paciente y cada 1000 días-paciente en hospitalización  
449 durante la inducción remisión. Para esto, se contará el número total de EA, así como el número  
450 de EA originados dentro del hospital. Así también, se contarán los días-paciente acumulados  
451 desde el inicio del abordaje diagnóstico hasta el final de la inducción o el fallecimiento del  
452 paciente, así como los días-paciente transcurridos en hospitalización. Adicionalmente, se  
453 estimarán las proporciones de EA por tipo, severidad y prevenibilidad cada 100 pacientes en

454 inducción a la remisión y por cada 100 hospitalizaciones en el mismo periodo. Para todos los  
455 estimadores de incidencia se calcularán intervalos de confianza al 95%.

456 Todos los análisis estadísticos se realizarán con el software IBM SPSS Statistics versión 25.

#### 457 **Consideraciones éticas y de bioseguridad**

458 **Ética.** Este estudio comprende el análisis y la evaluación secundaria de una cohorte de pacientes  
459 pediátricos con LLA del HIMFG, construida a partir de fuentes secundarias de documentación  
460 (expediente clínico), de manera observacional como parte del protocolo HIM-2018-018,  
461 “Evaluación de Errores de Medicación durante el Tratamiento de Inducción a la Remisión en  
462 Pacientes Pediátricos con Leucemia Linfoblástica Aguda”, el cual contó con la aprobación de los  
463 Comités de Investigación, Ética y Bioseguridad del HIMFG como un estudio “Sin Riesgo” para  
464 los pacientes. Por lo anterior, se pone a consideración del Comité de Ética en Investigación la  
465 dispensación del Consentimiento Informado de los pacientes cuya información será analizada en  
466 este proyecto de investigación. Es importante mencionar que los investigadores no difundirán  
467 información que identifique a los pacientes como: nombres, iniciales o el número de registro  
468 institucional. Adicionalmente, las RAMs identificadas en este estudio como EAM se reportarán  
469 al Centro Nacional de Farmacovigilancia a través de la plataforma Vigiflow, de acuerdo con la  
470 Norma Oficial Mexicana NOM-2020-SSA1-2016, instalación y operación de la  
471 farmacovigilancia.

472 **Bioseguridad.** De acuerdo a las instrucciones de llenado del Formato de Bioseguridad  
473 consideramos que este protocolo “No tiene implicaciones de Bioseguridad”.

474

475  
476  
477  
478  
479  
480  
481  
482  
483  
484  
485  
486  
487  
488  
489  
490  
491  
492  
493  
494  
495  
496  
497  
498  
499  
500  
501

## REFERENCIAS

1. Quality of care. World Health Organization. [Citado abril 21, 2021]. Disponible en: [https://www.who.int/health-topics/quality-of-care#tab=tab\\_1](https://www.who.int/health-topics/quality-of-care#tab=tab_1)
2. Campbell SM, Roland MO, Buetow SA. Defining quality of care. *Soc Sci Med*. 2000;51(11):1611-25.
3. Draft Global Patient Safety Action Plan 2021–2030. Towards eliminating avoidable harm in health care. World Health Organization-Patient Safety. [Citado abril 21, 2021]. Disponible en: [https://cdn.who.int/media/docs/default-source/patient-safety/gpsap/global-patient-safety-action-plan\\_12-apr-2021.pdf?sfvrsn=58ad8e9e\\_10](https://cdn.who.int/media/docs/default-source/patient-safety/gpsap/global-patient-safety-action-plan_12-apr-2021.pdf?sfvrsn=58ad8e9e_10)
4. Patient safety. World Health Organization. [Citado abril 21, 2021]. Disponible en: <https://www.who.int/teams/integrated-health-services/patient-safety>
5. National Academies of Sciences, Engineering, and Medicine; Health and Medicine Division; Board on Health Care Services; Board on Global Health; Committee on Improving the Quality of Health Care Globally. *Crossing the global quality chasm: improving health care worldwide*. Washington (DC): National Academies Press; 2018.
6. NHS Litigation Authority. *Annual report and accounts 2017/18*. London: Her Majesty's Stationery Office; 2018. [Citado abril 21, 2021]. Disponible en: <https://resolution.nhs.uk/wp-content/uploads/2018/08/NHSResolution-Annual-Report-2017-2018.pdf>
7. Hiatt HH, Barnes BA, Brennan TA, Laird NM, Lawthers AG, Leape LL, et al. A study of medical injury and medical malpractice. *N Engl J Med*. 1989;321(7):480-484.
8. Brennan TA, Leape LL, Laird NM, Hebert L, Localio AR, Lawthers AG, et al. Incidence of adverse events and negligence in hospitalized patients. Results of the Harvard Medical Practice Study I. *N Engl J Med*. 1991;324(6):370-376.
9. World alliance for patient safety: WHO draft guidelines for adverse event reporting and learning systems: from information to action. World Health Organization; 2005. [Citado junio 14, 2021]. Disponible en: <https://apps.who.int/iris/handle/10665/69797>

- 502 10. McFatrach M, Brondon J, Lucas NR, Hinds PS, Maurer SH, Mack JW, et al. Mapping child  
503 and adolescent self-reported symptom data to clinician-reported adverse event grading to  
504 improve pediatric oncology care and research. *Cancer*. 2020;126(1):140-147.
- 505 11. Nebeker JR, Barach P, Samore MH. Clarifying adverse drug events: a clinician's guide to  
506 terminology, documentation, and reporting. *Ann Intern Med*. 2004;140(10):795-801.
- 507 12. Lipitz-Snyderman A, Pfister D, Classen D, Atoria CL, Killen A, Epstein AS, et al.  
508 Preventable and mitigable adverse events in cancer care: Measuring risk and harm across the  
509 continuum. *Cancer*. 2017;123(23):4728-36.
- 510 13. Rodziewicz TL, Houseman B, Hipskind JE. Medical Error Reduction and Prevention.  
511 [Actualizado enero 4, 2021]. En: StatPearls [Internet]. Treasure Island (FL): StatPearls  
512 Publishing; 2021. Disponible en: <https://www.ncbi.nlm.nih.gov/books/NBK499956/>
- 513 14. Weingart SN, Nelson J, Koethe B, Yaghi O, Dunning S, Feldman A, et al. Developing a  
514 cancer-specific trigger tool to identify treatment-related adverse events using administrative  
515 data. *Cancer Med*. 2020;9(4):1462-72.
- 516 15. de Vries EN, Ramrattan MA, Smorenburg SM, Gouma DJ, Boermeester MA. The incidence  
517 and nature of in-hospital adverse events: a systematic review. *Qual Saf Health Care*.  
518 2008;17(3):216-23.
- 519 16. Williams DJ, Olsen S, Crichton W, Witte K, Flin R, Ingram J, et al. Detection of adverse  
520 events in a Scottish hospital using a consensus-based methodology. *Scott Med J*.  
521 2008;53(4):26-30.
- 522 17. Naessens JM, O'Byrne TJ, Johnson MG, Vansuch MB, McGlone CM, Huddleston JM.  
523 Measuring hospital adverse events: assessing inter-rater reliability and trigger performance  
524 of the Global Trigger Tool. *Int J Qual Health Care*. 2010;22(4):266-74.
- 525 18. Matlow AG, Cronin CM, Flintoft V, Nijssen-Jordan C, Fleming M, Brady-Fryer B, et al.  
526 Description of the development and validation of the Canadian Paediatric Trigger Tool. *BMJ*  
527 *Qual Saf*. 2011;20(5):416-23.

- 528 19. Alghamdi AA, Keers RN, Sutherland A, Ashcroft DM. Prevalence and Nature of Medication  
529 Errors and Preventable Adverse Drug Events in Paediatric and Neonatal Intensive Care  
530 Settings: A Systematic Review. *Drug Saf.* 2019;42(12):1423-36.
- 531 20. Woo SA, Cragg A, Wickham ME, Peddie D, Balka E, Scheuermeyer F, et al. Methods for  
532 evaluating adverse drug event preventability in emergency department patients. *BMC Med*  
533 *Res Methodol.* 2018;18(1):160. doi:10.1186/s12874-018-0617-4
- 534 21. Salaets T, Turner MA, Short M, Ward RM, Hokuto I, Ariagno RL, et al. Development of a  
535 neonatal adverse event severity scale through a Delphi consensus approach. *Arch Dis Child.*  
536 2019;104(12):1167-73.
- 537 22. Schwendimann R, Blatter C, Dhaini S, Simon M, Ausserhofer D. The occurrence, types,  
538 consequences and preventability of in-hospital adverse events - a scoping review. *BMC*  
539 *Health Serv Res.* 2018;18(1):521. doi: 10.1186/s12913-018-3335-z
- 540 23. Organisation for Economic Co-operation and Development. Measuring Patient Safety:  
541 Opening the Black Box. Paris, France: OECD; 2018. [Citado 14 junio, 2021]. Disponible en:  
542 <https://www.oecd.org/health/health-systems/Measuring-Patient-Safety-April-2018.pdf>  
543
- 544 24. WHO guidelines for safe surgery 2009: safe surgery saves lives. Ginebra: Organización  
545 Mundial de la Salud; 2009. [Citado abril 22, 2021]. Disponible en:  
546 [http://apps.who.int/iris/bitstream/handle/10665/44185/9789241598552\\_eng.pdf?sequence=1](http://apps.who.int/iris/bitstream/handle/10665/44185/9789241598552_eng.pdf?sequence=1)
- 547 25. Echevarría ZS, Sandoval CF, Gutiérrez DS, Alcantar BA, Cote EL. Eventos adversos en  
548 cirugía. *Cir. gen [revista en la Internet].* 2011 ;33(3):163-169. [citado junio 14, 2021].  
549 Disponible en: [http://www.scielo.org.mx/scielo.php?script=sci\\_arttext&pid=S1405-](http://www.scielo.org.mx/scielo.php?script=sci_arttext&pid=S1405-00992011000300005&lng=es)  
550 [00992011000300005&lng=es.](http://www.scielo.org.mx/scielo.php?script=sci_arttext&pid=S1405-00992011000300005&lng=es)
- 551 26. Gawande AA, Thomas EJ, Zinner MJ, Brennan TA. The incidence and nature of surgical  
552 adverse events in Colorado and Utah in 1992. *Surgery.* 1999;126(1):66-75.
- 553 27. Anderson O, Davis R, Hanna GB, Vincent CA. Surgical adverse events: a systematic review.  
554 *Am J Surg.* 2013;206(2):253-62.

- 555 28. Boeker EB, de Boer M, Kiewiet JJ, Lie-A-Huen L, Dijkgraaf MG, Boermeester MA.  
556 Occurrence and preventability of adverse drug events in surgical patients: a systematic  
557 review of literature. *BMC Health Serv Res.* 2013;13:364. doi: 10.1186/1472-6963-13-364.
- 558 29. Bates DW, Cullen DJ, Laird N, Petersen LA, Small SD, Servi D, et al. Incidence of adverse  
559 drug events and potential adverse drug events. Implications for prevention. ADE Prevention  
560 Study Group. *JAMA.* 1995;274(1):29-34.
- 561 30. Woo SA, Cragg A, Wickham ME, Villanyi D, Scheuermeyer F, Hau JP, et al. Preventable  
562 adverse drug events: Descriptive epidemiology. *Br J Clin Pharmacol.* 2020;86(2):291-302.
- 563 31. Una atención limpia es una atención más segura. Carga mundial de infecciones asociadas a la  
564 atención sanitaria. [Internet]. Organización Mundial de la Salud. [Citado mayo 21, 2021].  
565 Disponible en:  
566 [https://www.who.int/gpsc/country\\_work/burden\\_hcai/es/#:~:text=Las%20IAAS%2C%20ta](https://www.who.int/gpsc/country_work/burden_hcai/es/#:~:text=Las%20IAAS%2C%20ta,mbi%C3%A9n%20denominadas%20infecciones,el%20momento%20de%20su%20ingreso.)  
567 [mbi%C3%A9n%20denominadas%20infecciones,el%20momento%20de%20su%20ingreso.](https://www.who.int/gpsc/country_work/burden_hcai/es/#:~:text=Las%20IAAS%2C%20ta,mbi%C3%A9n%20denominadas%20infecciones,el%20momento%20de%20su%20ingreso.)
- 568 32. Horan TC, Andrus M, Dudeck MA. CDC/NHSN surveillance definition of health care-  
569 associated infection and criteria for specific types of infections in the acute care setting. *Am*  
570 *J Infect Control.* 2008;36(5):309-32.
- 571 33. Report on the burden of endemic health care-associated infection worldwide. Ginebra:  
572 Organización Mundial de la Salud; 2011. [Citado abril 22, 2021]. Disponible en:  
573 [http://apps.who.int/iris/bitstream/handle/10665/80135/9789241501507\\_eng.pdf?sequence=1](http://apps.who.int/iris/bitstream/handle/10665/80135/9789241501507_eng.pdf?sequence=1)
- 574 34. Khan LM. Comparative epidemiology of hospital-acquired adverse drug reactions in adults  
575 and children and their impact on cost and hospital stay--a systematic review. *Eur J Clin*  
576 *Pharmacol.* 2013;69(12):1985-96.
- 577 35. NCC MERP Index for Categorizing Medication Errors. National Coordinating Council for  
578 Medication Error Reporting and Prevention. [Citado mayo 22, 2021]. Disponible en:  
579 <https://www.nccmerp.org/types-medication-errors.>
- 580 36. Common Terminology Criteria for Adverse Events (CTCAE) v5.0. [Actualizado mayo 27,  
581 2020]. In: Cancer Therapy Evaluation Program (CTEP) [Internet]. National Institutes of  
582 Health: U.S. Department of Health and Human Services; 2017. [Citado junio 1,



- 583 2021]. Disponible en:  
584 [https://ctep.cancer.gov/protocolDevelopment/electronic\\_applications/docs/CTCAE\\_v5\\_Quick](https://ctep.cancer.gov/protocolDevelopment/electronic_applications/docs/CTCAE_v5_Quick_Reference_5x7.pdf)  
585 [Reference\\_5x7.pdf](https://ctep.cancer.gov/protocolDevelopment/electronic_applications/docs/CTCAE_v5_Quick_Reference_5x7.pdf)
- 586 37. Call RJ, Burlison JD, Robertson JJ, Scott JR, Baker DK, Rossi MG, et al. Adverse drug  
587 event detection in pediatric oncology and hematology patients: using medication triggers to  
588 identify patient harm in a specialized pediatric patient population. *J Pediatr*.  
589 2014;165(3):447-52.e4. Doi: 10.1016/j.jpeds.2014.03.033.
- 590 38. Hébert G, Netzer F, Kouakou SL, Lemare F, Minvielle E; IATRIGGER Working Group.  
591 Development of a 'ready-to-use' tool that includes preventability, for the assessment of  
592 adverse drug events in oncology. *Int J Clin Pharm*. 2018;40(2):376-85.
- 593 39. West Z, Allen K, Monroe C, Castellino SM, Miller TP. Adverse events during induction  
594 therapy in pediatric acute lymphoblastic lymphoma (ALL). *Blood*.  
595 2019;134(Supplement\_1):5809. doi: 10.1182/blood-2019-131873
- 596 40. Kirkendall ES, Kloppenborg E, Papp J, White D, Frese C, Hacker D, et al. Measuring  
597 adverse events and levels of harm in pediatric inpatients with the Global Trigger Tool.  
598 *Pediatrics*. 2012;130(5):e1206-14. doi: 10.1542/peds.2012-0179.
- 599 41. Hakkarainen KM, Andersson Sundell K, Petzold M, Hägg S. Methods for assessing the  
600 preventability of adverse drug events: a systematic review. *Drug Saf*. 2012;35(2):105-126.
- 601 42. Leape LL, Lawthers AG, Brennan TA, Johnson WG. Preventing medical injury. *QRB Qual*  
602 *Rev Bull*. 1993;19(5):144-9.
- 603 43. Gandhi TK, Weingart SN, Borus J, Seger AC, Peterson J, Burdick E, et al. Adverse drug  
604 events in ambulatory care. *N Engl J Med*. 2003;348(16):1556-64.
- 605 44. Pronovost PJ, Colantuoni E. Measuring preventable harm: helping science keep pace with  
606 policy. *JAMA*. 2009;301(12):1273-5.
- 607 45. Pérez FGM. Responsabilidad civil médica y la aplicación de los daños punitivos en  
608 México. *Rev. IUS [Revista en internet]*. 2020;14(46):143-62. [citado mayo 24, 2021].  
609 Disponible en: <[http://www.scielo.org.mx/scielo.php?script=sci\\_arttext&pid=S1870-](http://www.scielo.org.mx/scielo.php?script=sci_arttext&pid=S1870-21472020000200143&lng=es&nrm=iso)  
610 [21472020000200143&lng=es&nrm=iso](http://www.scielo.org.mx/scielo.php?script=sci_arttext&pid=S1870-21472020000200143&lng=es&nrm=iso)>. Epub 02-Dic-2020. ISSN 1870-2147.

- 611 46. Ferner RE, Aronson JK. Clarification of terminology in medication errors: definitions and  
612 classification. *Drug Saf.* 2006;29(11):1011-22.
- 613 47. Dubois RW, Brook RH. Preventable deaths: who, how often, and why? *Ann Intern Med.*  
614 1988;109(7):582-9.
- 615 48. Hallas J, Harvald B, Gram LF, Grodum E, Brøsen K, Haghfelt T, et al. Drug related hospital  
616 admissions: the role of definitions and intensity of data collection, and the possibility of  
617 prevention. *J Intern Med.* 1990;228(2):83-90.
- 618 49. Schumock GT, Thornton JP. Focusing on the preventability of adverse drug reactions. *Hosp*  
619 *Pharm.* 1992;27(6):538.
- 620 50. Rivera-Luna R, Shalkow-Klincovstein J, Velasco-Hidalgo L, Cárdenas-Cardós R, Zapata-  
621 Tarrés M, Olaya-Vargas A, et al. Descriptive epidemiology in Mexican children with cancer  
622 under an open national public health insurance program. *BMC Cancer.* 2014;14:790. doi:  
623 10.1186/1471-2407-14-790.
- 624 51. Stewart BW, Wild CP, eds. *World Cancer Report 2014.* Lyon, France: World Health  
625 Organization Press. 2014.
- 626 52. Cooper SL, Brown PA. Treatment of pediatric acute lymphoblastic leukemia. *Pediatr Clin*  
627 *North Am.* 2015;62(1):61–73.
- 628 53. Magrath I, Steliarova-Foucher E, Epelman S, Ribeiro RC, Harif M, Li CK, et al. Paediatric  
629 cancer in low-income and middle-income countries. *Lancet Oncol.* 2013;14(3):e104-16. doi:  
630 10.1016/S1470-2045(13)70008-1.
- 631 54. Rendón-Macías ME, Reyes-Zepeda NC, Villasís-Keever MA, Serrano JM, Escamilla AN.  
632 Tendencia mundial de la supervivencia en pacientes pediátricos con leucemia linfoblástica  
633 aguda. Revisión de las últimas cuatro décadas. *Bol Med Hosp Infant Mex.* 2012;69(3):153-  
634 63.
- 635 55. Aguilar-Hernández M, Fernández-Castillo G, Nuñez-Villegas NN, Pérez-Casillas RX,  
636 Núñez-Enríquez JC. Principales causas de mortalidad durante la fase de inducción en los  
637 pacientes pediátricos con leucemia linfoblástica aguda. *Rev Med Inst Mex Seguro Soc.*  
638 2017;55(3):286-91.

- 639 56. Rivera-Luna R, Olaya-Vargas A, Velásquez-Aviña M, Frenk S, Cárdenas-Cardós R, Leal-  
640 Leal C, et al. Early death in children with acute lymphoblastic leukemia: does malnutrition  
641 play a role? *Pediatr Hematol Oncol.* 2008;25(1):17-26. doi: 10.1080/08880010701774132.
- 642 57. Hunger SP, Mullighan CG. Acute Lymphoblastic Leukemia in Children. *N Engl J Med.*  
643 2015;373(16):1541-52.
- 644 58. Pui CH, Evans WE. Treatment of Acute Lymphoblastic Leukemia. *N Engl J Med.* 2006;  
645 354: 166-78.
- 646 59. Baytan B, Evim MS, Güler S, Güneş AM, Okan M. Acute Central Nervous System  
647 Complications in Pediatric Acute Lymphoblastic Leukemia. *Pediatr Neurol.* 2015;53(4):312-  
648 8.
- 649 60. Li MJ, Chang HH, Yang YL, Lu MY, Shao PL, Fu CM, et al. Infectious complications in  
650 children with acute lymphoblastic leukemia treated with the Taiwan Pediatric Oncology  
651 Group protocol: A 16-year tertiary single-institution experience. *Pediatr Blood Cancer.*  
652 2017;64(10). doi: 10.1002/pbc.26535.
- 653 61. Barajas-Nava LA, Garduño-Espinosa J. Medical interventions for cancer treatment-induced  
654 symptoms in children: an overview. *Bol Med Hosp Infant Mex.* 2016;73(6):467-83.
- 655 62. Weaver MS, Reeve BB, Baker JN, Martens CE, McFatrigh M, Mowbray C, et al. Concept-  
656 elicitation phase for the development of the pediatric patient-reported outcome version of the  
657 Common Terminology Criteria for Adverse Events. *Cancer.* 2016;122(1):141-8.
- 658 63. Howard SC, Davidson A, Luna-Fineman S, Israels T, Chantada G, Lam CG, et al. A  
659 framework to develop adapted treatment regimens to manage pediatric cancer in low- and  
660 middle-income countries: The Pediatric Oncology in Developing Countries (PODC)  
661 Committee of the International Pediatric Oncology Society (SIOP). *Pediatr Blood Cancer.*  
662 2017;64(Suppl 5). doi: 10.1002/pbc.26879.
- 663 64. Houweling TA, Kunst AE. Socio-economic inequalities in childhood mortality in low- and  
664 middle-income countries: a review of the international evidence. *Br Med Bull.* 2010;93:7-26.
- 665 65. Pui CH. Reducing delayed intensification therapy in childhood ALL. *Lancet Oncol.*  
666 2013;14(3):178-9.

- 667 66. Higashiyama Y, Kojima C, Kubota M, et al. Longitudinal nutritional assessment in acute  
668 lymphoblastic leukemia during treatment. *Pediatr Int.* 2014;56(4):541-46.
- 669 67. Morales-Ríos O, Cicero-Oneto C, García-Ruiz C, Villanueva-García D, Hernández-  
670 Hernández M, Olivar-López V, et al. Descriptive study of adverse drug reactions in a tertiary  
671 care pediatric hospital in México from 2014 to 2017. *PLoS One.* 2020;15(3):e0230576. doi:  
672 10.1371/journal.pone.0230576.
- 673 68. Gerber A, Da Silva Lopes A, Szüts N, Simon M, Ribordy-Baudat V, Ebnetter A, et al.  
674 Describing adverse events in Swiss hospitalized oncology patients using the Global Trigger  
675 Tool. *Health Sci Rep.* 2020;3(2):e160. doi: 10.1002/hsr2.160.
- 676 69. Edwards IR, Aronson JK. Adverse drug reactions: definitions, diagnosis, and  
677 management. *Lancet.* 2000;356(9237):1255-59.
- 678 70. Vázquez-Cornejo E, Morales-Ríos O, Juárez-Villegas LE, Islas Ortega EJ, Vázquez-  
679 Estupiñán F, Garduño-Espinosa J. Medication errors in a cohort of pediatric patients with  
680 acute lymphoblastic leukemia on remission induction therapy in a tertiary care hospital in  
681 Mexico. *Cancer Med.* 2019;8(13):5979-87.
- 682 71. Nazer LH, Hawari F, Al-Najjar T. Adverse drug events in critically ill patients with cancer:  
683 incidence, characteristics, and outcomes. *J Pharm Pract.* 2014;27(2):208-13.
- 684 72. Nazer LH, Eljaber R, Rimawi D, Hawari FI. Adverse drug events resulting in admission to  
685 the intensive care unit in oncology patients: Incidence, characteristics and associated cost. *J*  
686 *Oncol Pharm Pract.* 2013;19(4):298-304.
- 687 73. Chopra D, Rehan HS, Sharma V, Mishra R. Chemotherapy-induced adverse drug reactions  
688 in oncology patients: A prospective observational survey. *Indian J Med Paediatr Oncol.*  
689 2016;37(1):42-46.
- 690 74. Lau PM, Stewart K, Dooley M. The ten most common adverse drug reactions (ADRs) in  
691 oncology patients: do they matter to you?. *Support Care Cancer.* 2004;12(9):626-33.
- 692 75. Shrestha S, Shakya R, Shrestha S, Shakya S. Adverse Drug Reaction due to Cancer  
693 Chemotherapy and its Financial Burden in Different Hospitals of Nepal. *Int J Pharmacovigil.*  
694 2017;2(1):1-7.

- 695 76. Wahlang JB, Laishram PD, Brahma DK, Sarkar C, Lahon J, Nongkynrih BS. Adverse drug  
696 reactions due to cancer chemotherapy in a tertiary care teaching hospital. *Ther Adv Drug*  
697 *Saf.* 2017;8(2):61-6.
- 698 77. Ramasubbu SK, Pasricha RK, Nath UK, Das B. Frequency, nature, severity and  
699 preventability of adverse drug reactions arising from cancer chemotherapy in a teaching  
700 hospital. *J Family Med Prim Care.* 2020;9(7):3349-55.
- 701 78. Sharma A, Kumari KM, Manohar HD, Bairy KL, Thomas J. Pattern of adverse drug  
702 reactions due to cancer chemotherapy in a tertiary care hospital in South India. *Perspect Clin*  
703 *Res.* 2015;6(2):109-15.
- 704 79. Berchiolla P, Scaioli G, Passi S, Gianino MM. Adverse events in hospitalized paediatric  
705 patients: a systematic review and a meta-regression analysis. *J Eval Clin Pract.*  
706 2014;20(5):551-8.
- 707 80. Stockwell DC, Landrigan CP, Toomey SL, Loren SS, Jang J, Quinn JA, Ashrafzadeh S,  
708 Wang MJ, Wu M, Sharek PJ, Classen DC, Srivastava R, Parry G, Schuster MA; GAPPS  
709 Study Group. Adverse Events in Hospitalized Pediatric Patients. *Pediatrics.*  
710 2018;142(2):e20173360. doi: 10.1542/peds.2017-3360.
- 711 81. Leape LL, Brennan TA, Laird N, Lawthers AG, Localio AR, Barnes BA, et al. The nature of  
712 adverse events in hospitalized patients. Results of the Harvard Medical Practice Study II. *N*  
713 *Engl J Med.* 1991;324(6):377-84.
- 714 82. Soop M, Fryksmark U, Köster M, Haglund B. The incidence of adverse events in Swedish  
715 hospitals: a retrospective medical record review study. *Int J Qual Health Care.*  
716 2009;21(4):285-91
- 717 83. *Protocolo de manejo para pacientes pediátricos con leucemia linfoblástica no tratados*  
718 *previamente. En Guías [Internet]. Hospital Infantil de México Federico Gómez. [Citado*  
719 *agosto 25, 2021]. Disponible en:*  
720 *<http://www.himfg.edu.mx/descargas/documentos/planeacion/guiasclinicasHIM/LeuAguLinfo>*  
721 *blastica.pdf*

722

- 723 **Investigadores.**
- 724
- 725 **Investigador responsable.**
- 726
- 727 *Edmundo Vázquez Cornejo*
- 728 Departamento de Evaluación de Medicamentos y Farmacovigilancia
- 729 55 5228 9917 ext. 2356.
- 730 edmundovaco21@gmail.com
- 731
- 732 **Investigador suplente.**
- 733
- 734 *Olga Magdala Morales Ríos*
- 735 Departamento de Evaluación de Medicamentos y Farmacovigilancia/Unidad Habilitada de Apoyo
- 736 al Predictamen.
- 737 55 5228 9917 ext. 2356.
- 738 magdalaqfb@yahoo.com.mx
- 739
- 740 **Investigadores asociados.**
- 741 *Carlo Cicero Oneto*
- 742 Departamento de hemato-oncología.
- 743
- 744 *Gabriela Hernández Pliego*
- 745 Departamento de hemato-oncología.
- 746
- 747 *Juan Garduño Espinosa*
- 748 Dirección de Investigación.
