# Supplementary material for: Incidence, severity, and preventability of adverse events during the induction of patients with acute lymphoblastic leukemia in a tertiary care pediatric hospital in Mexico
Source: PubMed Central journal article supplement (PMC8947076; doi:10.1371/journal.pone.0265450), 2022-03-24

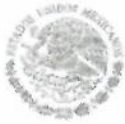

**SALUD**  
SECRETARÍA DE SALUD

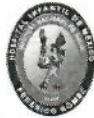

Hospital Infantil de México Federico Gómez  
Instituto Nacional de Salud  
Dirección General

Ciudad de México, 23 de septiembre del 2021

DG/1000/ 7 50 /2021

**M en C. Edmundo Vázquez Cornejo**  
**Unidad Habilitada de Apoyo al Predictamen**  
**Presente**

Informo a usted, que los Comités de Investigación, Ética en Investigación y Bioseguridad, después de haber revisado su protocolo **HIM-2021-065** titulado **"Incidencia, severidad y prevenibilidad de eventos adversos en el tratamiento de inducción a la remisión de pacientes con leucemia linfoblástica aguda en un hospital pediátrico de tercer nivel en México"**, han emitido el dictamen de:

**APROBADO**

En los términos y condiciones señalados por dichos Comités. Por lo anterior, se autoriza su desarrollo.

Atentamente

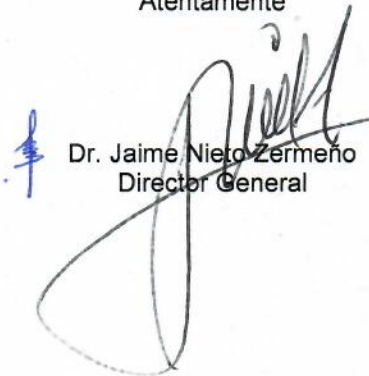  
Dr. Jaime Nieto Zermeño  
Director General

Con copia:  
Dr. Juan Garduño Espinosa. Director de Investigación.

  
JNZ/JGE/MSG/vzn

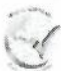

Dr. Marquez 162, Col. Doctores, CP. 06720, Alcaldía Cuauhtémoc, Ciudad de México.  
Tel: (55) 5228 9917 ext. 2315 y 4322 <https://www.gob.mx/salud/himfg>

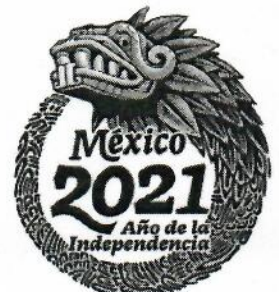

Supplement: pone.0265450.s010.pdf [file pone.0265450.s010.pdf]
